# Supplementary material
Source: PubMed Central journal article supplement (PMC3504728)
Supplement: supp_M112.348763_jbc.M112.348763-1.pdf [file supp_M112.348763_jbc.M112.348763-1.pdf]

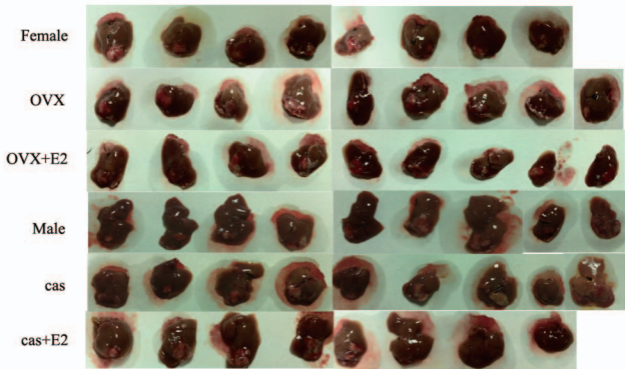

supplementary figure 1

Supplementary Figure 1. **Gender disparity in HCC progression *in vivo*.** Tumors in the left lobe of liver 2 weeks after implantation of Heps cells. The images are representative of tumors in each group.
