# Supplementary material
Source: PubMed Central journal article supplement (PMC3504728)
Supplement: supp_M112.348763_jbc.M112.348763-2.pdf [file supp_M112.348763_jbc.M112.348763-2.pdf]

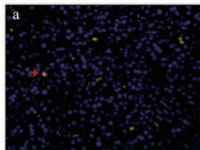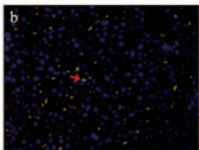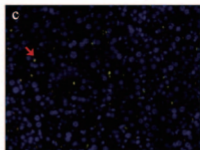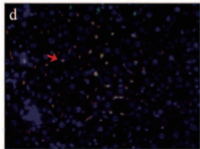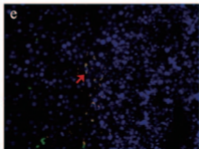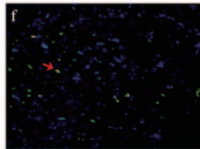

supplementary figure 2

Supplementary Figure 2 **The alternative activation state of macrophages in tumor-bearing mice were determined by immunofluorescence staining.** Sections of 8-week-old orthotopic hepatocarcinoma mouse livers were immunolabeled with anti-mouse CD68 (FITC-conjugated, green) to identify macrophage populations. Anti-mouse CD206 (PE-conjugated, red) were used to label alternatively activated macrophage. DAPI (blue) was used to identify cell nucleus. Superimposed images demonstrate that CD206<sup>+</sup> macrophages undergoes sex dimorphism in female (**a**) and male (**d**) control. Loss of estrogen induced macrophage (black arrows) infiltration in female mice after ovariectomy (**b**). Administration of 17 $\beta$ -estradiol (50  $\mu$ g/kg) *s.c.* every other day attenuated macrophage infiltration (**c**). Male mice after castration did not display significant variance in macrophage infiltration (**e**) while administration of 17 $\beta$ -estradiol (50  $\mu$ g/kg) *s.c.* every other day in castrated male mice displayed attenuated macrophage alternative activation state (**f**). (magnification, 200 $\times$ ).
