# Supplementary material
Source: PubMed Central journal article supplement (PMC3504728)
Supplement: supp_M112.348763_jbc.M112.348763-3.pdf [file supp_M112.348763_jbc.M112.348763-3.pdf]

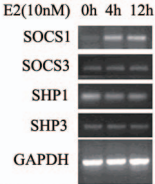

supplementary figure 3

Supplementary Figure 3. **The effects of E2 on negative regulators of JAK-STAT6 pathway.**  
SOCS1, SOCS3, SHP1 and SHP3 were analyzed by RT-PCR system.
