# Supplementary material
Source: PubMed Central journal article supplement (PMC3504728)
Supplement: supp_M112.348763_jbc.M112.348763-4.pdf [file supp_M112.348763_jbc.M112.348763-4.pdf]

supplementary  
figure 4

| Gene Name                       | Primer Sequence (5'-3')  | Amplicon<br>Size |
|---------------------------------|--------------------------|------------------|
| <i>Arg1</i>                     | AAGACAGCAGAGGAGGTG       | 103              |
|                                 | AGTCAGTCCCCTGGCTTAT      |                  |
| <i><math>\beta</math>-actin</i> | GCTCTGGCTCCTAGCACC       | 74               |
|                                 | CCACCTATCCACACAGAGTACTTG |                  |
| <i>CD206</i>                    | GCAGGTGGTTTATGGGATGT     | 111              |
|                                 | GGGTTTCAGGAGTTGTTGTGG    |                  |
| <i>Ym1</i>                      | AGAAGGGAGTTTCAAACCTGGT   | 197              |
|                                 | GTCTTGCTCATGTGTGTAAGTGA  |                  |
| <i>Fizz1</i>                    | CCAATCCAGCTAACTATCCCTCC  | 108              |
|                                 | ACCCAGTAGCAGTCATCCCA     |                  |
| <i>SOCS1</i>                    | CTGCGGCTTCTATTGGGGAC     | 216              |
|                                 | AAAAGGCAGTCGAAGGTCTCG    |                  |
| <i>SOCS3</i>                    | ATGGTCACCCACAGCAAGTTT    | 145              |
|                                 | TCCAGTAGAATCCGCTCTCCT    |                  |
| <i>SHP1</i>                     | CCAGGGCAAGATGAGGGAGA     | 195              |
|                                 | GGACCTCGGTTGGCAATGTA     |                  |
| <i>SHP2</i>                     | CAGCCTGGTATCACCGTGAC     | 103              |
|                                 | GCCACGCTCTCGCTATCTC      |                  |
| <i>GAPDH</i>                    | ATTCAACGGCACAGTCAA       | 720              |
|                                 | AAGGTGGAAGAGTGGGAGT      |                  |

Supplementary Figure 4. **The entire list of primers used in experiments.**
